# Supplementary material
Source: PubMed Central journal article supplement (PMC6026011)

**A**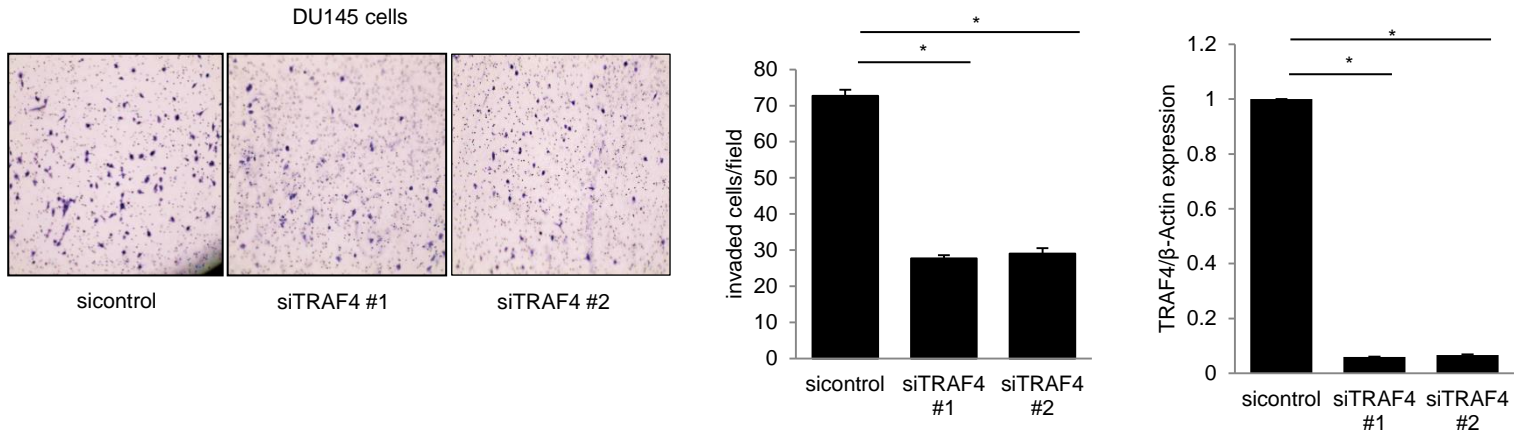**B**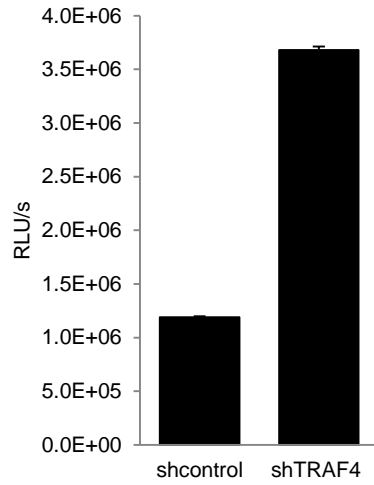**C**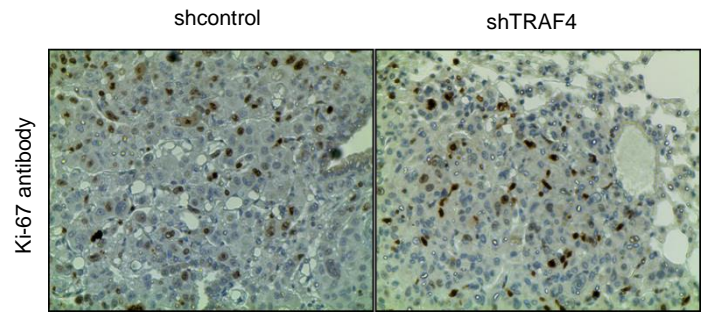

**Supplemental Figure 1.** (A) Knockdown of TRAF4 using specific siRNAs decreased DU145 cell invasion. Left panel, crystal violet staining of invaded cells (n=3). Images were obtained at 100X magnification. Middle panel, quantitation of invaded cells per field. Right panel, the levels of TRAF4 in control or TRAF4 knockdown cells as assessed by qRT-PCR. \*P < 0.05 by one way ANOVA with Dunnett's multiple comparisons test. (n=3) (B) PC3 shTRAF4 cells have higher luminescence intensity than shcontrol cells. (C) Comparable levels of Ki-67 staining in shctrl and shTRAF4 tumor samples as determined by IHC analysis. Images were obtained at 100X magnification. Data are represented as the mean ± SEM.

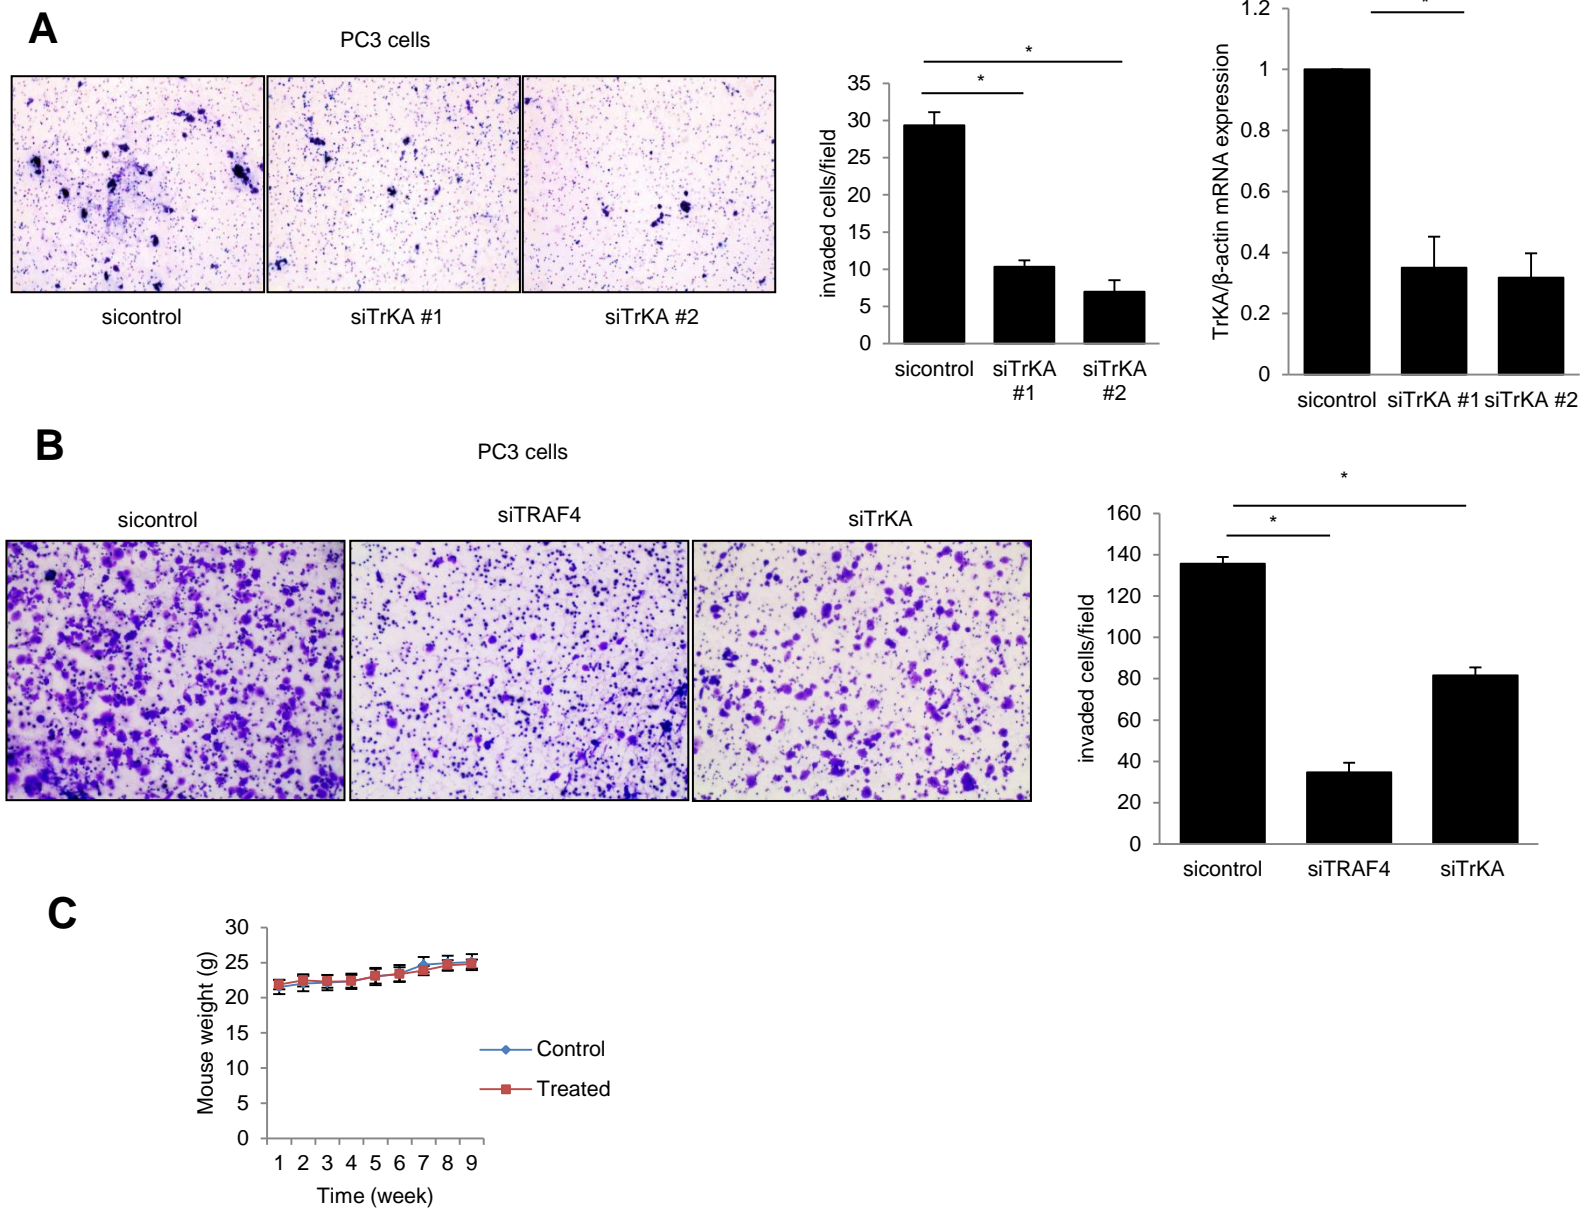

**Supplemental Figure 2.** (A) Knockdown of TrkA using specific siRNAs decreased PC3 cell invasion ( $n=3$ ). Images were obtained at 100X magnification. Right panel, the levels of TrkA in control or TrkA knockdown cells as assessed by qRT-PCR. ( $n=3$ ). \* $P < 0.05$  by one way ANOVA with Dunnett's multiple comparisons test. (B) TrkA knockdown has an inhibitory effect on PC3 cell invasion similar to the effect of TRAF4 knockdown ( $n=3$ ). Images were obtained at 100X magnification. Right panel, quantitation of TRAF4 or TrKA siRNA knockdown invaded cells per field after invasion. \* $P < 0.05$  by one way ANOVA with Dunnett's multiple comparisons test. (C) TrkA inhibitor treatment did not change mouse weights. Data are represented as the mean  $\pm$  SEM. ( $n=3$ ). \* $P < 0.05$  by two tailed Student's t test.

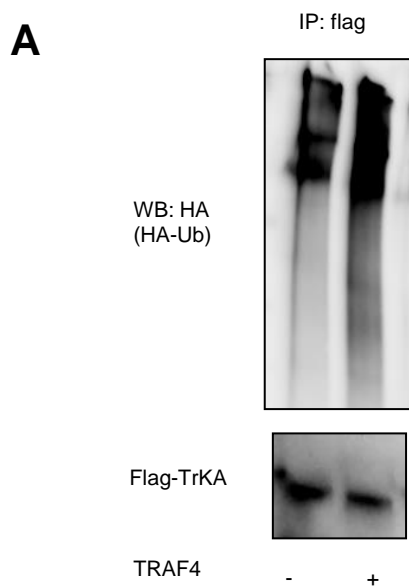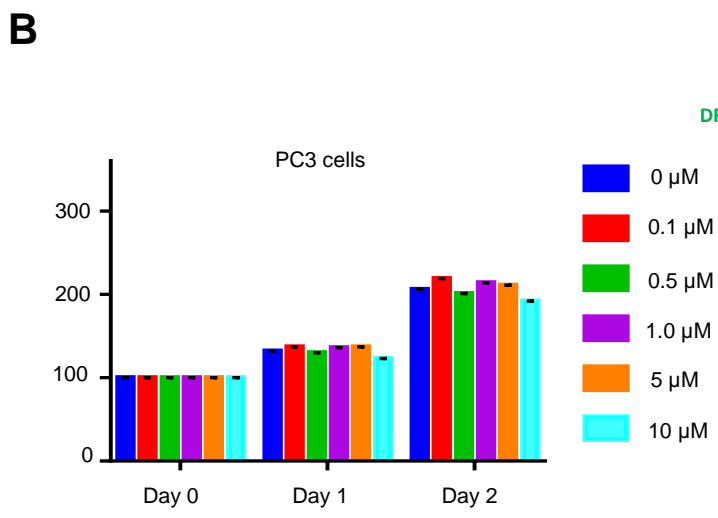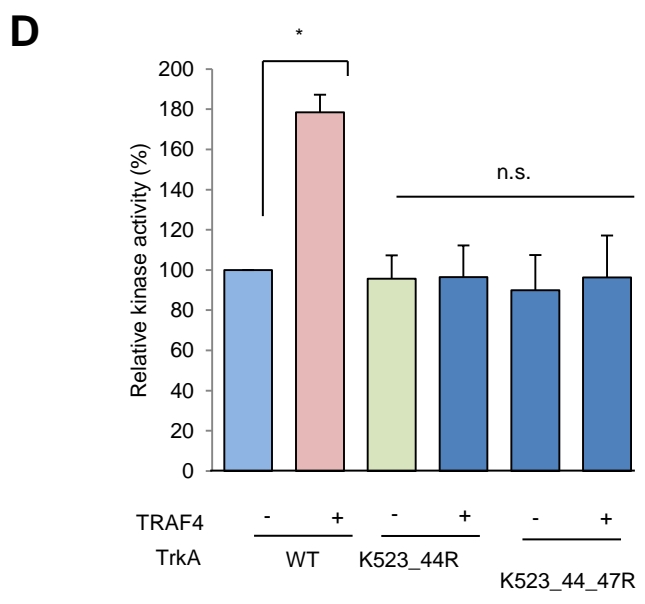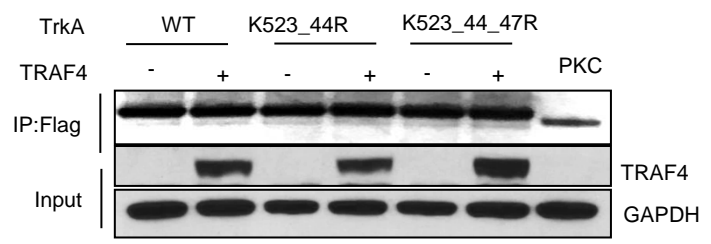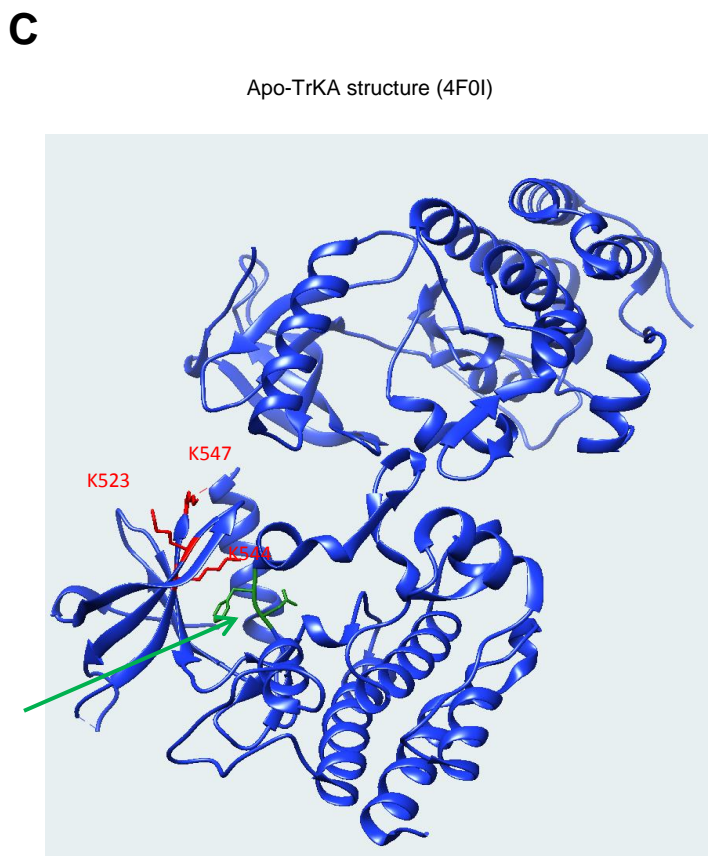

**Supplemental Figure 3.** (A) TRAF4 promoted TrkA ubiquitination in vitro. Flag-TrkA was transiently transfected into 293T cells and purified using an anti-flag antibody. The purified protein was then incubated with HA-ubiquitin, UBE1, UbcH5a in the absence or presence of purified TRAF4. The levels of TrkA ubiquitination was determined by immunoprecipitation using an anti-flag antibody followed by Western blot analysis using an anti-HA antibody. (B) TrkA inhibitor, GW441756, did not significantly affect cell growth in PC3 cells for specified dose and time treatment in PC3 cells. (n=3). (C) Lysine residues K523, K544 and K547 (shown in red) are located close proximity to the DFG motif (shown in green) in the kinase activation loop. Show is crystal structure of apo-TrkA kinase domain (PDB ID: 4F0I (44)). (D) Mutation of K523 and K544 to R abolished TRAF4-mediated TrkA activation in vitro. The upper panel shows the in vitro kinase activity of TrkA and its mutants in the absence or presence of TRAF4 overexpression. The bottom panel shows that comparable amount of TrkA proteins were used in the in vitro kinase assay as assessed by the Western blot analysis. Data are represented as the mean  $\pm$  SEM. (n=3). \*P <0.05 by one way ANOVA.

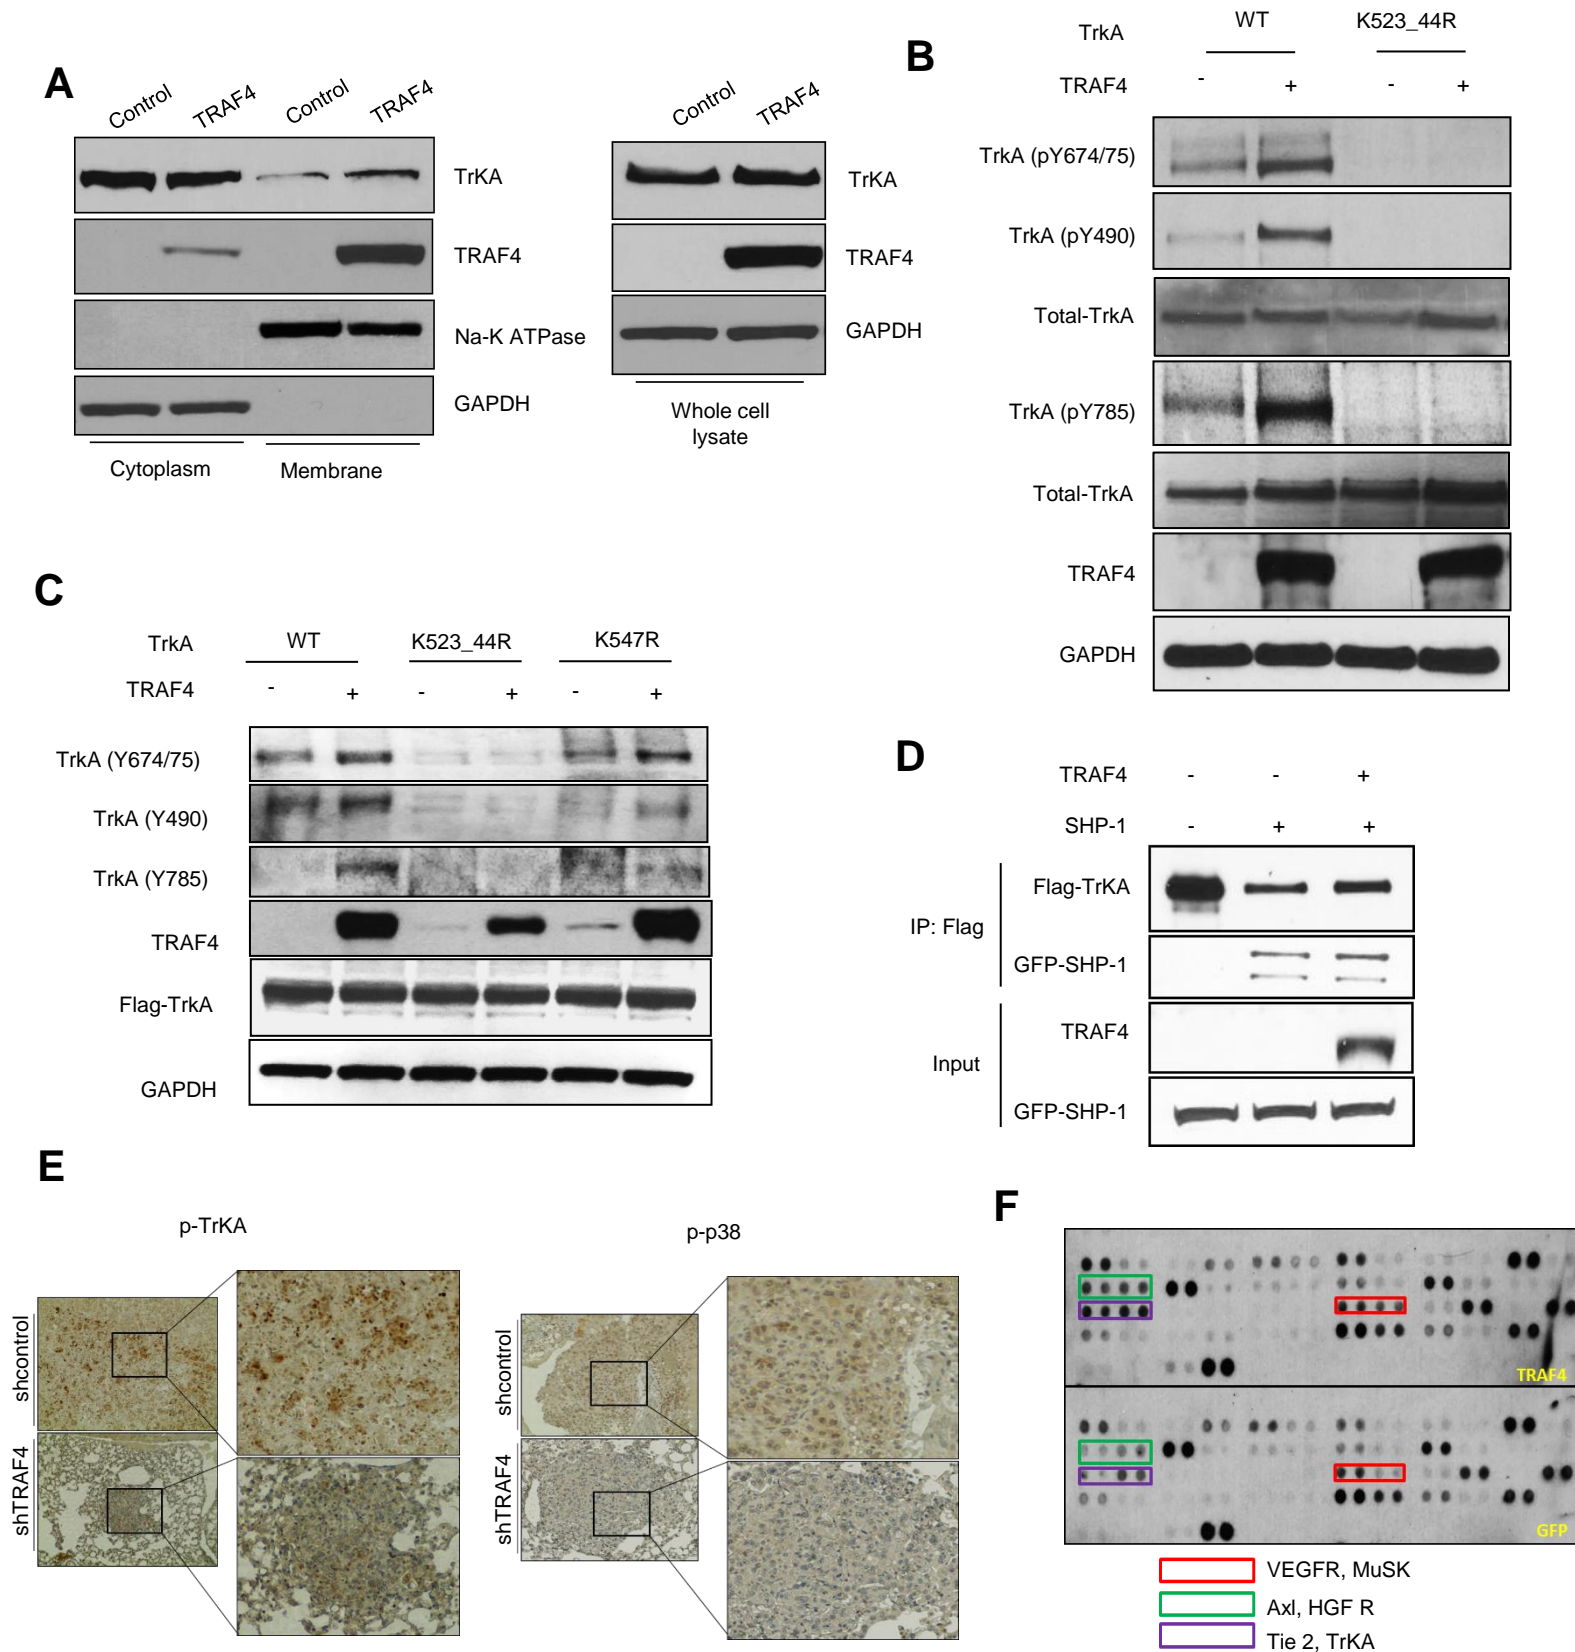

**Supplemental Figure 4.** (A) TRAF4 overexpression did not have a major effect on TrkA cellular distribution. DU145 cells were serum starved and transfected with or without TRAF4 followed by NGF stimulation. Cytosolic and membrane fraction were then isolated and the levels of TrkA and TRAF4 in each fraction were visualized by Western blot analysis using specific antibodies. Right panel, total TrkA level in DU145 whole cell lysates with NGF treatment. Na-K ATPase was used as an internal control for membrane fraction and GAPDH for cytoplasmic and total protein. (B) K523\_44R mutation abolished TrkA tyrosine phosphorylation. (C) K547R single mutation did not abolish TrkA tyrosine phosphorylation. (D) TRAF4 overexpression did not alter the interaction between TrkA and SHP-1 phosphatase. Flag-TrkA was transfected into 293T cells with or without TRAF4 co-transfection. Shown is a co-IP experiment using a flag-specific antibody. (E) The levels of p-p38 (pT180/Y182) and p-TrkA (pY785) were significantly reduced in TRAF4 knockdown metastatic tumors compared tumors derived from control cells. Shown are representative immunohistochemistry images at 40X and 100X (inset) magnification from lung tumors derived from PC3 cell tail-vein injection (n=3 per group). (F) TRAF4 overexpression increased ubiquitination of several receptor tyrosine kinases. Equal amount of cell lysates from GFP (control) or TRAF4 expressing adenovirus infected PC3 cells were incubated with a RTK array. Each duplicate dot represents the ubiquitination level of a target protein recognized by an anti-ubiquitin antibody.

Supplemental Table T1

|    | Gene            | Primer sequence                |
|----|-----------------|--------------------------------|
| 1  | TrKA_5.1        | 5'-agtcagccacggtgatgaa-3'      |
| 2  | TrKA_3.1        | 5'-cgttctcctgttgaggtcac-3'     |
| 3  | SLUG_5.1        | 5'-tggttgctcaaggacacat-3'      |
| 4  | SLUG_3.1        | 5'-gcaaagtctctgttgcatg-3'      |
| 5  | IL-6_5.1        | 5'-gatgagtacaaaagtctgatcca-3'  |
| 6  | IL-6_3.1        | 5'-ctgcagccactggtctgt-3'       |
| 7  | Cox-2_5.1       | 5'cttcacgcatcagttttcaag-3'     |
| 8  | Cox-2_3.1       | 5'tcaccgtaaatatgatttaagccac-3' |
| 9  | Integrin_α4_5.1 | 5'-gatgaaaatgagcctgaaacg-3'    |
| 10 | Integrin_α4_3.1 | 5'-gccatactattgccagtggtga-3'   |
| 11 | Integrin_β4_5.1 | 5'-tcagcctctctgggacctt-3'      |
| 12 | Integrin_β4_3.1 | 5'-tccttatccacacggacaca-3'     |
| 13 | Integrin_β1_5.1 | 5'-cgatgccatcatgcaagt-3'       |
| 14 | Integrin_β1_3.1 | 5'-acaccagcagccgtgaac-3'       |
| 15 | ACTB_5.1        | 5'-ccaaccgagagaagatga-3'       |
| 16 | ACTB_3.1        | 5'-ccagaggcgtacagggatag-3'     |

Supplemental Table T2

|    | Gene                    | Primer sequence                           |
|----|-------------------------|-------------------------------------------|
| 1  | TrKA-ΔCT-domain-3-XhoI  | 5'-ccattctcgagggttcgagccggcggtgca-3'      |
| 2  | TrKA-ΔTK-domain-3-XhoI  | 5'-ccattctcgagggtgaacacagggcatcactgaa-3'  |
| 3  | TrKA-ΔJM-domain-3-XhoI  | 5'-ccattctcgaggagcacaaggagcagcgtaga-3'    |
| 4  | TrKA-ΔTM-domain-3-XhoI  | 5'-ccattctcgaggccacagccaccgagaccca-3'     |
| 5  | TrKA-IC-5-EcoRI         | 5'-ccattgaattcctgcccgtcttctgctgcctct-3'   |
| 6  | TrKA-ΔTK1-domain-3-XhoI | 5'-ccattctcgagggaagaagcgcacgatgtgctggt-3' |
| 7  | TrKA TK EcoRI_5.1       | 5'-ccattgaattccacatcaagcgcgggacatc-3'     |
| 8  | TrKA_K775R_5.1          | 5'-cacagcatcagggatgtgcacgcc-3'            |
| 9  | TrKA_K775R_3.1          | 5'-gcgttgctggggctccc-3'                   |
| 10 | TrKA_K725R_5.1          | 5'-acctacggcaggcagccctgg-3'               |
| 11 | TrKA_K725R_3.1          | 5'-gaagatctccagagcaccacg-3'               |
| 12 | TrKA_K703R_5.1          | 5'-ctgtaccgtaggttcaccaccg-3'              |
| 13 | TrKA_K703R_3.1          | 5'-gatgctctcgggcat-3'                     |
| 14 | TrKA_K665R_5.1          | 5'-ctgggtgctcaggattggtgatttg-3'           |
| 15 | TrKA_K665R_3.1          | 5'-tccctggcccactagaca-3'                  |
| 16 | TrKA_K609R_5.1          | 5'-cctgatgccaggctgctggct-3'               |
| 17 | TrKA_K609R_3.1          | 5'-tccatgggatcggggaagc-3'                 |
| 18 | TrKA_K544_47R_5.1       | 5'-gtggctgtcaggcactgaggagg-3'             |
| 19 | TrKA_K544_47R_3.1       | 5'-cagcatctgtcctgctc-3'                   |
| 20 | TrKA_K523R_5.1          | 5'-gccttgggagggtctcctgctgag-3'            |
| 21 | TrKA_K523R_3.1          | 5'-gccctccccagctcca-3'                    |
| 22 | TrKA_K547R_5.1          | 5'-aaggcactgaggaggcgtcc-3'                |
| 23 | TrKA_K547R_3.1          | 5'-gacagccaccagcatctg-3'                  |
| 24 | TrKA_K523R_5.2          | 5'-gccttgggagggtctcctg-3'                 |
| 25 | TrKA_K523R_3.2          | 5'-gccctccccagctccactt-3'                 |

Supplemental Table 1, 2. RT-qPCR primer sequence and cloning sequence used in the study. 5.1 denotes forward and 3.1 denotes reverse primer.

Supplemental Table T3

| S. no | Antibody                            |
|-------|-------------------------------------|
| 1     | 14-3-3zeta,gamma,eta_R_V            |
| 2     | Akt_R_V                             |
| 3     | p-Akt(S473)_R_V                     |
| 4     | p-Akt(T308)_R_V                     |
| 5     | ALK(D5F3)XP_R_V                     |
| 6     | p-ALK(3B4)(Y1586)_R_V               |
| 7     | p-ALK(Y1604)_R_V                    |
| 8     | p-AMPKa(40H9)(T172)_R_V             |
| 9     | p-AMPKa1(S485)_R_V                  |
| 10    | p-AMPKb1(S108)_R_V                  |
| 11    | Annexin1_R_V                        |
| 12    | ATM_R_V                             |
| 13    | ATR_R_V                             |
| 14    | p-ATR(S428)_R_V                     |
| 15    | p-AuroraA(T288)/B(T232)/C(T198)_R_V |
| 16    | AuroraA/AIK_R_V                     |
| 17    | p-Axl(D12B2)(Y702)_R_V              |
| 18    | Bad_R_V                             |
| 19    | p-Bad(S112)_R_V                     |
| 20    | p-Bad(S136)_R_V                     |
| 21    | p-Bad(S155)_R_V                     |
| 22    | Bak_R_V                             |
| 23    | Bax_R_V                             |
| 24    | p-Bcl2(5H2)(S70)_R_V                |
| 25    | p-Bcl2(T56)_R_V                     |
| 26    | Bcl-xL_R_V                          |
| 27    | BRCA1_R_V                           |
| 28    | BRCA2_R_V                           |
| 29    | E-Cadherin(24E10)_R_V               |
| 30    | N-Cadherin_R_V                      |
| 31    | Caspase-3_R_V                       |
| 32    | p-Beta-Catenin(S33/37/T41)_R_V      |
| 33    | Caveolin-1(D46G3)XP_R_V             |
| 34    | p-Caveolin-1(EPR2288Y)(Y14)_R_V     |
| 35    | CD24(FL-80)_R_V                     |
| 36    | p-Chk1(S345)_R_V                    |
| 37    | p-Chk2(S33/35)_R_V                  |
| 38    | Claudin-1_R_V                       |
| 39    | c-Met_R_V                           |
| 40    | p-c-Myc(T58)_R_V                    |
| 41    | DKK1_R_V                            |
| 42    | EGFR(D38B1)XP_R_V                   |
| 43    | EGFR(L858R)_R_V                     |
| 44    | p-EGFR(S1046/1047)_R_V              |
| 45    | p-EGFR(Y1045)_R_V                   |
| 46    | p-EGFR(Y1148)_R_V                   |
| 47    | p-EGFR(Y1173)_R_V                   |
| 48    | p-EGFR(Y1173)(53A5)_R_V             |
| 49    | p-EGFR(Y1068)(D7A5)XP_R_V           |
| 50    | Ezh2(D2C9)XP_R_V                    |

|     |                                            |
|-----|--------------------------------------------|
| 51  | FGFR1(D8E4)XP_R_V                          |
| 52  | FoxO1(C29H4)_R_V                           |
| 53  | FSP1/S100A4_R_V                            |
| 54  | p-HER2/ErbB2(Y1248)_R_V                    |
| 55  | p-HER2/ErbB2(Y877)_R_V                     |
| 56  | HER3/ErbB3_R_V                             |
| 57  | p-HER3/ErbB3(Y1197)_R_V                    |
| 58  | HDAC1_R_V                                  |
| 59  | HDAC3_R_V                                  |
| 60  | HDAC4_R_V                                  |
| 61  | HDAC6_R_V                                  |
| 62  | ILK1_R_V                                   |
| 63  | p-Jak1(Y1022/1023)_R_V                     |
| 64  | Kit-c_R_V                                  |
| 65  | Lipocalin-1_R_V                            |
| 66  | LRP6_R_V                                   |
| 67  | MEK1_R_V                                   |
| 68  | p-MEK1/2(S217/221)_R_V                     |
| 69  | p-Met(Y1234/1235)_R_V                      |
| 70  | MMP-9_R_V                                  |
| 71  | mTOR_R_V                                   |
| 72  | p-mTOR(D9C2)XP(S2448)_R_V                  |
| 73  | Notch1(C44H11)_R_V                         |
| 74  | p-p27(T187)_R_V                            |
| 75  | p-p27/KIP1(T198)_R_V                       |
| 76  | p27/KIP1(C-term)_R_V                       |
| 77  | p38/MAPK_R_V                               |
| 78  | p-p38(D3F9) XP(T180/Y182)_R_V              |
| 79  | p44/42MAPK(Erk1/2)_R_V                     |
| 80  | p-p44/42MAPK(Erk1/2)(T202/Y204)(197G2)_R_V |
| 81  | p53_R_V                                    |
| 82  | p-p53(S15)_R_V                             |
| 83  | p70S6K_R_V                                 |
| 84  | p-p70S6K(S371)_R_V                         |
| 85  | p-p70S6K(T389)_R_V                         |
| 86  | p-p70S6K(T412)_R_V                         |
| 87  | p-PDGFRa(23B2)(Y754)_R_V                   |
| 88  | PDGFRb(28E1)_R_V                           |
| 89  | p-PDGFRb(Y751)_R_V                         |
| 90  | p-PDK1(S241)_R_V                           |
| 91  | PIAS1_R_V                                  |
| 92  | PTEN(D4.3)XP_R_V                           |
| 93  | p-PTEN(S380)_R_V                           |
| 94  | p-RafB(S445)_R_V                           |
| 95  | RANKL_R_V                                  |
| 96  | p-Ret(Y905)_R_V                            |
| 97  | SerpinA1_R_V                               |
| 98  | Slug(C19G7)_R_V                            |
| 99  | p-Smad2(S465/467)_R_V                      |
| 100 | SOCS1(A156)_R_V                            |
| 101 | SOCS3_R_V                                  |
| 102 | Sox2(D6D9) XP_R_V                          |
| 103 | p-Src(Y527)_R_V                            |

|     |                           |
|-----|---------------------------|
| 104 | Stat1_R_V                 |
| 105 | p-Stat1(Y701)(D4A7)_R_V   |
| 106 | p-Stat2(Y690)_R_V         |
| 107 | p-Stat3(S727)_R_V         |
| 108 | p-Stat4(Y693)_R_V         |
| 109 | p-Stat5(Y694)_R_V         |
| 110 | Stat6_R_V                 |
| 111 | p-Stat6(Y641)_R_V         |
| 112 | p-Tuberin/TSC2(T1462)_R_V |
| 113 | Vimentin(D21H3)XP_R_V     |
| 114 | Wnt5a/b(C27E8)_R_V        |
| 115 | YAP(H125)_R_V             |
| 116 | ZO-1_R_V                  |
| 117 | cleaved Caspase-7_R_V     |
| 118 | VEGFR2(55B11)_R_V         |
| 119 | Stat5a(L-20)_R_V          |
| 120 | SOX9_R_V                  |
| 121 | p-SAPK/JNK(T183/Y185)_R_V |
| 122 | Zeb1_R_V                  |
| 123 | PHF8(pAb)_R_V             |
| 124 | ASH2_R_V                  |
| 125 | CBP(A-22)_R_V             |
| 126 | c-Fos(9F6)_R_V            |
| 127 | CHAF1A(D77D5)XP_R_V       |
| 128 | c-Jun(60A8)_R_V           |
| 129 | CRSP1-TRAP220_R_V         |
| 130 | CtBP2_R_V                 |
| 131 | Cyclin C_R_V              |
| 132 | DRIP130_R_V               |
| 133 | FBXO11_R_V                |
| 134 | FoxK2_R_V                 |
| 135 | KLF4_R_V                  |
| 136 | MED12-Abcam_R_V           |
| 137 | p-c-Fos(S32)_R_V          |
| 138 | PPP1R10(EPR11706)_R_V     |
| 139 | Stat3(D3Z2G)_R_V          |
| 140 | p-TRAP220-MED1(T1457)_R_V |
| 141 | HIF-2A(D9E3)_R_V          |
| 142 | p-c-Jun(S63)_R_V          |
| 143 | Sin3b_R_V                 |
| 144 | p-Rb(S807/811)_R_V        |
| 145 | p-FAK(Y576/577)_R_V       |
| 146 | Ki67_R_V                  |
| 147 | Integrina4(D2E1)XP_R_V    |
| 148 | Integrina5_R_V            |
| 149 | IntegrinaV_R_V            |
| 150 | Integrinb1(D2E5)_R_V      |
| 151 | Integrinb3(D7X3P)XP_R_V   |
| 152 | Integrinb4_R_V            |
| 153 | PI3Kp85_R_V               |
| 154 | AMPKa(23A3)_R_V           |
| 155 | PI3Kp110a(C73F8)_R_V      |
| 156 | ERa(SP1)_R_V              |



|     |                                    |
|-----|------------------------------------|
| 157 | MEK6_R_V                           |
| 158 | p21_R_V                            |
| 159 | Atg12(D88H11)_R_V                  |
| 160 | Beclin-1(D40C5)_R_V                |
| 161 | Caspase-3(Asp175)_R_V              |
| 162 | Beta-Catenin(CT)_R_V               |
| 163 | Atg3_R_V                           |
| 164 | Atg7_R_V                           |
| 165 | LC3A(D50G8)XP_R_V                  |
| 166 | LC3B(D11)XP_R_V                    |
| 167 | p-EGFR(Y845)_R_V                   |
| 168 | p-EGFR(Y992)_R_V                   |
| 169 | p-ErbB2/HER2(Y1248)_R_V            |
| 170 | HER2/c-ErbB2_R_V                   |
| 171 | ALDH_M_V                           |
| 172 | ALDH2_M_V                          |
| 173 | p-ATM(S1981)_M_V                   |
| 174 | Axl_M_V                            |
| 175 | Chk2(1C12)_M_V                     |
| 176 | Cox-2_M_V                          |
| 177 | GATA3_M_V                          |
| 178 | GSK-3a/b_M_V                       |
| 179 | HER2/c-ErbB2-P185_M_V              |
| 180 | HIF-1a_M_V                         |
| 181 | p-IkappaB-a(S32/36)_M_V            |
| 182 | S100A7/CBP_M_V                     |
| 183 | Twist(Twist2C1a)_M_V               |
| 184 | SRC-3(clone 1208/D1)_M_V           |
| 185 | c-Myc(clone 1123)_M_V              |
| 186 | SRC-2(TIF2)_M_V                    |
| 187 | SRC-1(clone 1135/H4,1136/H4H6)_M_V |
| 188 | PR(1294)_M_V                       |
| 189 | Rb(4H1)_M_V                        |
| 190 | p-FAK(Y397)_M_V                    |
| 191 | AR-441_M_V                         |
| 192 | Bcl2(Clone-124)_M_V                |
| 193 | c-Src(B-12)_M_V                    |
| 194 | IGF-IR(3B7)_M_V                    |
| 195 | Laminin5_M_V                       |
| 196 | Aromatase-A(Clone 677H7F10)_M_V    |
| 197 | AOX1(cloneAO15)_M_V                |
| 198 | IDH2_M_V                           |
| 199 | SCD1 (CD.E10)_M_V                  |
| 200 | p-SHC(2431)(Y317)_R_V              |
| 201 | SRD5A1_R_V                         |
| 202 | FAS_R_V                            |
| 203 | Hexokinasell(C64G5)_R_V            |
| 204 | PFKFB3 (C-terminal)_R_V            |
| 205 | RRM2 (EPR11820)_R_V                |
| 206 | GLDC_R_V                           |
| 207 | GLS1_R_V                           |
| 208 | LDHA_R_V                           |
| 209 | PHGDH_R_V                          |

|     |                       |
|-----|-----------------------|
| 210 | PKM2_R_V              |
| 211 | PKM1/2_R_V            |
| 212 | p-Rb(S780)(C84F6)_R_V |
| 213 | p300(C-20)_R_V        |

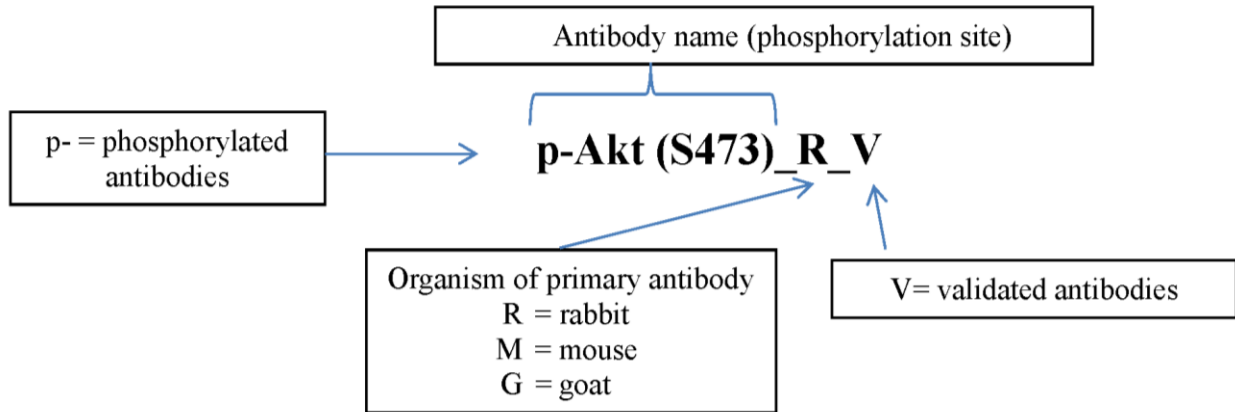

Supplement: jci-128-96060-s346.pdf [file jci-128-96060-s346.pdf]
